# Supplementary material for: Predicting Lymph Node Metastases in Patients with Biopsy-Proven Ductal Carcinoma In Situ of the Breast: Development and Validation of the DCIS-met Model
Source: PubMed Central journal article supplement (PMC10027636; doi:10.1245/s10434-022-12900-7), 2022-12-10
Supplement: 10434_2022_12900_MOESM2_ESM.pdf [file 10434_2022_12900_MOESM2_ESM.pdf]

**Supplement 2:**  
**Characteristics of invasive breast cancer cases with lymph node metastasis after biopsy-proven DCIS in the model development cohort**

| Tumour characteristics       |                          |     | N                   | %  |    |
|------------------------------|--------------------------|-----|---------------------|----|----|
| Morphology                   |                          |     | 113                 |    |    |
|                              | Lobular                  |     | 2                   | 2  |    |
|                              | Ductal                   |     | 105                 | 93 |    |
|                              | Mixed Ductal and Lobular |     | 3                   | 3  |    |
|                              | Other                    |     | 3                   | 3  |    |
| Grade of the invasive tumour |                          |     | 103                 |    |    |
|                              | I                        |     | 13                  | 13 |    |
|                              | II                       |     | 40                  | 39 |    |
|                              | III                      |     | 50                  | 48 |    |
| ER receptor                  |                          |     | 109                 |    |    |
|                              | Negative                 |     | 23                  | 21 |    |
|                              | Positive                 |     | 86                  | 79 |    |
| PR receptor                  |                          |     | 109                 |    |    |
|                              | Negative                 |     | 44                  | 40 |    |
|                              | Positive                 |     | 65                  | 60 |    |
| Her2Neu                      |                          |     | 109                 |    |    |
|                              | Negative                 |     | 76                  | 70 |    |
|                              | Positive                 |     | 33                  | 30 |    |
| Receptor combinations        |                          |     | 106                 |    |    |
|                              | ER-                      | PR- | Her2Neu -           | 8  | 8  |
|                              | ER+                      |     | Her2Neu -           | 66 | 62 |
|                              | ER-                      | PR- | Her2Neu +           | 14 | 13 |
|                              | ER+                      |     | Her2Neu +           | 17 | 16 |
|                              | ER-                      | PR+ | Her2Neu +           | 1  | <1 |
| Tumour size (in mm)          |                          |     | 109                 |    |    |
|                              | mean - median (range)    |     | 16.5 - 11 ( 1 - 90) |    |    |
| TNM stage                    |                          |     | 113                 |    |    |
|                              | I A                      |     | 0                   | 0  |    |
|                              | I B                      |     | 16                  | 14 |    |
|                              | II A                     |     | 52                  | 46 |    |
|                              | II B                     |     | 20                  | 18 |    |
|                              | III A                    |     | 16                  | 14 |    |
|                              | III B                    |     | 0                   | 0  |    |
|                              | III C                    |     | 9                   | 8  |    |
|                              | IV                       |     | 0                   | 0  |    |
