# Supplementary material for: Predicting Lymph Node Metastases in Patients with Biopsy-Proven Ductal Carcinoma In Situ of the Breast: Development and Validation of the DCIS-met Model
Source: PubMed Central journal article supplement (PMC10027636; doi:10.1245/s10434-022-12900-7), 2022-12-10
Supplement: 10434_2022_12900_MOESM3_ESM.pdf [file 10434_2022_12900_MOESM3_ESM.pdf]

**Supplement 3:  
Risk of lymph node metastases in primary or secondary axillary  
evaluation in the model validation cohort**

|                                        | Biopsies with DCIS | Lymph Node metastasis |      |                  |      | p-value                 |
|----------------------------------------|--------------------|-----------------------|------|------------------|------|-------------------------|
|                                        |                    | No                    |      | Yes              |      |                         |
|                                        |                    | N                     | %    | N                | %    |                         |
| Total                                  | 2269               | 2220                  | 98   | 49               | 2.2  |                         |
| Age (mean, median, range)              | 59.4, 59 (23-90)   | 59.5, 59 (23-90)      |      | 56.0, 57 (27-78) |      | 0.055*                  |
| Detection mode                         |                    |                       |      |                  |      | <0.001 <sup>&amp;</sup> |
| Screening                              | 1530               | 1509                  | 98.6 | 21               | 1.4  |                         |
| Otherwise                              | 739                | 711                   | 96.2 | 28               | 3.8  |                         |
| Palpable                               |                    |                       |      |                  |      | <0.001 <sup>&amp;</sup> |
| No                                     | 1894               | 1867                  | 98.6 | 27               | 1.4  |                         |
| Yes                                    | 375                | 353                   | 5.9  | 22               | 5.9  |                         |
| DCIS grade                             |                    |                       |      |                  |      | 0.01 <sup>#</sup>       |
| Low                                    | 263                | 263                   | 100  | 0                | 0    |                         |
| Intermediate                           | 954                | 932                   | 97.7 | 22               | 2.3  |                         |
| High                                   | 1052               | 1025                  | 97.4 | 27               | 2.6  |                         |
| BI-RADS score                          |                    |                       |      |                  |      | <0.001 <sup>#</sup>     |
| 3                                      | 117                | 116                   | 99.2 | 1                | 0.9  |                         |
| 4                                      | 1939               | 1907                  | 98.4 | 32               | 1.7  |                         |
| 5                                      | 213                | 197                   | 92.5 | 16               | 7.5  |                         |
| Suspected invasive component at biopsy |                    |                       |      |                  |      | 0.003 <sup>#</sup>      |
| No                                     | 2221               | 2177                  | 98.0 | 44               | 2.0  |                         |
| Yes                                    | 48                 | 43                    | 89.6 | 5                | 10.4 |                         |

The p-value was determined with \*Mann-Whitney U test, <sup>#</sup> Fisher's exact test, & Chi-square test
