# Supplementary material for: Predicting Lymph Node Metastases in Patients with Biopsy-Proven Ductal Carcinoma In Situ of the Breast: Development and Validation of the DCIS-met Model
Source: PubMed Central journal article supplement (PMC10027636; doi:10.1245/s10434-022-12900-7), 2022-12-10
Supplement: 10434_2022_12900_MOESM4_ESM.pdf [file 10434_2022_12900_MOESM4_ESM.pdf]

**Supplement 4:  
Predicted risk of LN metastasis for example cases in the model  
development cohort**

| Preoperative characteristics        | Example case |           |           |           |           |           |           |           |           |           |
|-------------------------------------|--------------|-----------|-----------|-----------|-----------|-----------|-----------|-----------|-----------|-----------|
|                                     | 1            | 2         | 3         | 4         | 5         | 6         | 7         | 8         | 9         | 10        |
| Age                                 | 50           | 50        | 64        | 74        | 50        | 64        | 64        | 64        | 45        | 45        |
| Detection mode                      | Screening    | Screening | Screening | Screening | Screening | Otherwise | Otherwise | Otherwise | Otherwise | Otherwise |
| Palpable                            | No           | No        | No        | No        | No        | Yes       | Yes       | Yes       | Yes       | Yes       |
| BI-RADS score                       | 4            | 4         | 4         | 4         | 5         | 4         | 5         | 5         | 4         | 5         |
| DCIS histological grade at biopsy\$ | Low          | High      | High      | High      | High      | Interm.   | High      | High      | Interm.   | High      |
| Suspected invasive component biopsy | No           | No        | No        | No        | No        | No        | No        | Yes       | No        | No        |
| Predicted risk (%)                  | 1.1          | 3.4       | 2.2       | 1.6       | 7.7       | 6.3       | 14.6      | 24.2      | 10.9      | 23.9      |

\$ Intermediate is given as Interm..
